# Supplementary material for: Phytochemical profiling of Livistona carinensis leaf extract via UHPLC-QTOF-MS/MS with assessment of its antiviral mechanisms
Source: Royal Society of Chemistry journal article supplement (doi:10.1039/d4ra02705a), 2024-01-01
Supplement: d4ra02705a1.pdf [file d4ra02705a1.pdf]

## Supplementary Data

### **Phytochemical profiling of *Livistona carinensis* leaves extract via UHPLC-QTOF-MS/MS and NMR with assessment of its antiviral mechanisms**

Amr M.K. Mahrous<sup>1\*</sup>, Mohamed S. Hifnawy<sup>2</sup>, Rehab M.S. Ashour<sup>2</sup>, Marwa Yousry Issa<sup>2</sup>,  
Ahmed Zayed<sup>3\*</sup>

<sup>1</sup> Faculty of Pharmacy, El Saleheya El Gadida University, El Saleheya El Gadida 44813, Egypt

<sup>2</sup> Department of Pharmacognosy, Faculty of Pharmacy, Cairo University, Kasr El-Aini Street, Cairo 11562, Egypt

<sup>3</sup> Department of Pharmacognosy, College of Pharmacy, Tanta University, El-Guish Street (Medical Campus), 31527 Tanta, Egypt

#### **\* Correspondence**

- **Dr. Amr M.K. Mahrous**

Faculty of Pharmacy, El Saleheya El Gadida University, El Saleheya El Gadida 44813, Egypt

E-Mail: [amrmkh@gmail.com](mailto:amrmkh@gmail.com)

- **Dr. Ahmed Zayed**

Department of Pharmacognosy, College of Pharmacy, Tanta University, El-Guish Street (Medical Campus), 31527 Tanta, Egypt

E-Mail: [ahmed.zayed1@pharm.tanta.edu.eg](mailto:ahmed.zayed1@pharm.tanta.edu.eg)

**Table S1.** Metabolites detected in the ethanolic extract of *Livistona carinensis* leaves via UPLC-QTOF-MS/MS

| Peak No. | Rt (min) | Precursor ion [M-H] <sup>-</sup> | Elemental composition                                       | Base peak | Error (ppm) | MS/MS fragments                    | Metabolites assignment | Chemical class          | Ref. |
|----------|----------|----------------------------------|-------------------------------------------------------------|-----------|-------------|------------------------------------|------------------------|-------------------------|------|
| 1        | 0.4300   | 173.0086                         | C <sub>6</sub> H <sub>6</sub> O <sub>6</sub>                | 173       | 0.0098      | 173, 129, 111, 85                  | Aconitic acid          | Organic acid            | 1    |
| 2        | 0.4657   | 191.0207                         | C <sub>6</sub> H <sub>8</sub> O <sub>7</sub>                | 111       | 0.0203      | 191, 173, 129, 111, 85             | Citric acid            | Organic acid            | 2    |
| 3        | 0.4658   | 133.0142                         | C <sub>4</sub> H <sub>6</sub> O <sub>5</sub>                | 133       | 0.0145      | 133, 115, 71                       | Malic acid             | Organic acid            | 3    |
| 4        | 0.4659   | 117.0196                         | C <sub>4</sub> H <sub>6</sub> O <sub>4</sub>                | 73        | 0.0182      | 117, 73                            | Succinic acid          | Organic acid            | 4    |
| 5        | 0.4800   | 147.0301                         | C <sub>5</sub> H <sub>8</sub> O <sub>5</sub>                | 129       | 0.0302      | 147, 129, 85, 59                   | Citramalic acid        | Organic acid            | 5    |
| 6        | 0.4900   | 128.0361                         | C <sub>5</sub> H <sub>7</sub> NO <sub>3</sub>               | 128       | 0.0358      | 128, 127, 82                       | Oxo-proline            | Amino acid derivative   | 6    |
| 7        | 0.5000   | 179.0577                         | C <sub>9</sub> H <sub>8</sub> O <sub>4</sub>                | 135       | 0.0563      | 179, 161, 135, 131, 89, 85, 71, 59 | Caffeic acid           | Phenolic acid           | 7    |
| 8        | 0.5172   | 353.0893                         | C <sub>16</sub> H <sub>18</sub> O <sub>9</sub>              | 191       | 0.0885      | 353, 191, 179                      | Chlorogenic acid       | Phenolic acid           | 6    |
| 9        | 0.5172   | 137.0240                         | C <sub>6</sub> H <sub>6</sub> N <sub>2</sub> O <sub>2</sub> | 93        | 0.0251      | 137, 93, 79, 65                    | Urocanic acid          | Organic acid derivative | 8    |
| 10       | 0.5301   | 609.1396                         | C <sub>27</sub> H <sub>30</sub> O <sub>16</sub>             | 449       | 0.0615      | 609, 447, 285                      | Luteolin-di-O-hexose   | Flavone di-glycoside    | 9    |
| 11       | 0.5560   | 134.0473                         | C <sub>5</sub> H <sub>5</sub> N <sub>5</sub>                | 134       | 0.0475      | 134, 107, 92                       | Adenine                | Nucleoside              | 6    |
| 12       | 0.6200   | 175.0598                         | C <sub>7</sub> H <sub>12</sub> O <sub>5</sub>               | 175       | 0.0618      | 175, 157, 131, 115, 113, 85, 73    | Isopropylmalic acid    | Organic acid            | 10   |

|    |        |          |                                                 |       |        |                                   |                                      |                                 |    |
|----|--------|----------|-------------------------------------------------|-------|--------|-----------------------------------|--------------------------------------|---------------------------------|----|
| 13 | 0.7330 | 461.1281 | C <sub>21</sub> H <sub>18</sub> O <sub>12</sub> | 461   | 0.1318 | 461, 419, 285, 193, 151           | Kaempferol-hexuronide                | Flavonoid glycoside             | 11 |
| 14 | 0.7340 | 433.1396 | C <sub>25</sub> H <sub>22</sub> O <sub>7</sub>  | 433   | 0.1351 | 433, 395, 300, 179                | Haplopappin                          | Flavonoid                       | 10 |
| 15 | 0.8250 | 447.1506 | C <sub>21</sub> H <sub>20</sub> O <sub>11</sub> | 447   | 0.1524 | 447, 429, 401, 357, 327, 299, 293 | Kaempferol-O-hexoside                | Flavonoid glycoside             | 9  |
| 16 | 0.9100 | 130.9833 | C <sub>5</sub> H <sub>8</sub> O <sub>4</sub>    | 87    | 0.9835 | 131, 87, 57                       | Methylsuccinic acid                  | Organic acid derivative         | 8  |
| 17 | 1.0200 | 137.0257 | C <sub>7</sub> H <sub>6</sub> O <sub>3</sub>    | 137   | 0.0249 | 137, 136, 108, 93                 | Salicylic acid                       | Phenolic acid derivative        | 1  |
| 18 | 1.4060 | 177.0211 | C <sub>9</sub> H <sub>6</sub> O <sub>4</sub>    | 177   | 0.0201 | 177, 149, 133                     | Dihydroxy-coumarin (Aesculetin)      | Hydroxy-coumarin                | 6  |
| 19 | 1.4061 | 343.1026 | C <sub>12</sub> H <sub>24</sub> O <sub>11</sub> | 343   | 0.1050 | 343, 299, 137, 89                 | Maltitol                             | Disaccharide                    | 11 |
| 20 | 2.0210 | 385.1860 | C <sub>17</sub> H <sub>22</sub> O <sub>10</sub> | 385   | 0.1884 | 385, 325, 223, 152, 89            | Sinapoyl hexoside                    | Hydroxy-cinnamic acid glycoside | 10 |
| 21 | 2.0380 | 431.1924 | C <sub>21</sub> H <sub>20</sub> O <sub>10</sub> | 431   | 0.1927 | 431, 341, 311, 283, 269           | Apigenin-C-hexoside (Vitexin)        | Flavone glycoside               | 9  |
| 22 | 2.0382 | 447.0934 | C <sub>21</sub> H <sub>20</sub> O <sub>11</sub> | 447   | 0.0956 | 447, 401, 357, 327, 297, 285      | Luteolin-C-hexoside (Isoorientin)    | Flavonoid glycosides            | 12 |
| 23 | 2.4990 | 60.9929  | CH <sub>2</sub> O <sub>3</sub>                  | 60.99 | 0.0229 | 60.99                             | Carbonic acid                        | Organic acid                    | 1  |
| 24 | 2.5960 | 593.1507 | C <sub>27</sub> H <sub>30</sub> O <sub>15</sub> | 593   | 0.1507 | 593, 473, 413, 315                | Isorhamnetin-O-pentoside deoxyhexose | Flavonoid glycoside             | 9  |

|    |        |          |                                                 |     |        |                              |                                                          |                       |    |
|----|--------|----------|-------------------------------------------------|-----|--------|------------------------------|----------------------------------------------------------|-----------------------|----|
| 25 | 2.7980 | 593.1524 | C <sub>27</sub> H <sub>30</sub> O <sub>15</sub> | 593 | 0.1515 | 593, 431, 413, 293           | Kaempferol- <i>O</i> -hexose-deoxyhexoside               | Flavonoid glycosides  | 9  |
| 26 | 2.8440 | 167.0343 | C <sub>8</sub> H <sub>8</sub> O <sub>4</sub>    | 167 | 0.0346 | 167, 152, 124, 108           | Homogentisic acid                                        | Phenolic acid         | 6  |
| 27 | 3.1390 | 431.0990 | C <sub>21</sub> H <sub>20</sub> O <sub>10</sub> | 431 | 0.0998 | 431, 341, 311, 283           | Apigenin- <i>C</i> -hexoside (Vitexin)                   | Flavone glycoside     | 12 |
| 28 | 3.2900 | 523.2192 | C <sub>26</sub> H <sub>36</sub> O <sub>11</sub> | 361 | 0.1232 | 523, 492, 477, 361           | Secoisolariciresinol mono-hexoside                       | Lignan                | 10 |
| 29 | 3.4400 | 138.0193 | C <sub>6</sub> H <sub>5</sub> NO <sub>3</sub>   | 138 | 0.0199 | 138, 108, 92                 | Para-nitrophenol                                         | Phenolics             | 6  |
| 30 | 4.0900 | 623.1631 | C <sub>28</sub> H <sub>32</sub> O <sub>16</sub> | 623 | 0.1641 | 623, 577, 315                | Isorhamnetin- <i>O</i> -hexose-deoxyhexoside (Narcissin) | Flavonol glycoside    | 11 |
| 31 | 4.2100 | 447.0939 | C <sub>21</sub> H <sub>20</sub> O <sub>11</sub> | 447 | 0.0941 | 447, 357, 327, 297, 285, 137 | Luteolin- <i>C</i> -hexose (Orientin)                    | Flavone glycoside     | 10 |
| 32 | 4.2900 | 507.1152 | C <sub>23</sub> H <sub>24</sub> O <sub>13</sub> | 507 | 0.1139 | 507, 461, 345                | Syringetin- <i>O</i> -hexoside                           | Flavonol glycoside    | 10 |
| 33 | 4.3100 | 449.1508 | C <sub>21</sub> H <sub>22</sub> O <sub>11</sub> | 449 | 0.1491 | 449, 287                     | Okanin- <i>O</i> -hexoside (Marein)                      | Chalcone/ Aurone      | 10 |
| 34 | 4.5091 | 341.0676 | C <sub>12</sub> H <sub>22</sub> O <sub>11</sub> | 341 | 0.0677 | 341, 179, 161                | Dihexose                                                 | Disaccharide          | 8  |
| 35 | 4.5490 | 637.1762 | C <sub>29</sub> H <sub>34</sub> O <sub>16</sub> | 329 | 0.0659 | 637, 329, 314                | Tricin- <i>O</i> -hexose-deoxyhexoside                   | Flavone glycoside     | 9  |
| 36 | 4.5810 | 317.1498 | C <sub>16</sub> H <sub>31</sub> BrO             | 225 | 0.1142 | 317, 299, 225, 207, 181      | Bromopalmitaldehyde                                      | Fatty acid derivative | 10 |
| 37 | 4.7060 | 193.0517 | C <sub>6</sub> H <sub>10</sub> O <sub>7</sub>   | 193 | 0.0508 | 193, 178, 161, 133           | Uronic acid                                              | Sugar acid            | 13 |

|    |        |          |                                                 |     |        |                                   |                                                 |                    |       |
|----|--------|----------|-------------------------------------------------|-----|--------|-----------------------------------|-------------------------------------------------|--------------------|-------|
| 38 | 4.7070 | 477.1378 | C <sub>22</sub> H <sub>22</sub> O <sub>12</sub> | 477 | 0.1439 | 477, 315, 271                     | Isorhamnetin- <i>O</i> -hexoside                | Flavonol glycoside | 14    |
| 39 | 4.8130 | 377.1758 | C <sub>24</sub> H <sub>26</sub> O <sub>4</sub>  | 241 | 0.0174 | 377, 345, 241, 152, 137           | Albafuran A                                     | Benzofuran         | 6     |
| 40 | 4.8347 | 507.1468 | C <sub>23</sub> H <sub>24</sub> O <sub>13</sub> | 507 | 0.1493 | 507, 345                          | Syringetin- <i>O</i> -hexoside                  | Flavonol glycoside | 10    |
| 41 | 4.8471 | 405.1709 | C <sub>20</sub> H <sub>22</sub> O <sub>9</sub>  | 405 | 0.1683 | 405, 243                          | Trihydroxy-3'-hexopyranosylstilbene (Astringin) | Stilbene glycoside | 6     |
| 42 | 5.0495 | 445.1853 | C <sub>21</sub> H <sub>18</sub> O <sub>11</sub> | 269 | 0.1860 | 445, 409, 269, 161                | Baicalein- <i>O</i> -hexouronide (Baicalin)     | Flavone glycoside  | 11    |
| 43 | 5.1845 | 287.0564 | C <sub>15</sub> H <sub>12</sub> O <sub>6</sub>  | 287 | 0.0565 | 287, 151, 135, 134                | Tetrahydroxy flavanone (Eriodictyol)            | Flavanone          | 15    |
| 44 | 5.5620 | 869.2329 | C <sub>54</sub> H <sub>77</sub> O <sub>9</sub>  | 869 | 0.1786 | 869, 833, 637, 329                | Tricin derivative                               | -----              | ----- |
| 45 | 5.5645 | 611.1412 | C <sub>28</sub> H <sub>36</sub> O <sub>15</sub> | 611 | 0.1452 | 611, 565, 413, 311                | Neohesperidin dihydrochalcone                   | Chalcone/ Aurone   | 6     |
| 46 | 5.6345 | 285.0411 | C <sub>15</sub> H <sub>10</sub> O <sub>6</sub>  | 285 | 0.0409 | 285, 241, 175, 151, 133           | Tetrahydroxyflavone (Luteolin)                  | Flavones           | 9     |
| 47 | 5.6855 | 301.0340 | C <sub>15</sub> H <sub>10</sub> O <sub>7</sub>  | 301 | 0.0361 | 301, 273, 255, 193, 179, 151, 121 | Pentahydroxyflavone (Quercetin)                 | Flavonol           | 12    |
| 48 | 5.8207 | 449.1473 | C <sub>21</sub> H <sub>22</sub> O <sub>11</sub> | 287 | 0.1451 | 449, 413, 341, 287                | Marein (Okanin- <i>O</i> -hexose)               | Chalcone/ Aurone   | 10    |
| 49 | 5.9246 | 195.1016 | C <sub>6</sub> H <sub>12</sub> O <sub>7</sub>   | 195 | 0.1025 | 195, 151, 123, 94                 | Pentahydroxyhexanoic acid (Gluconic acid)       | Sugar acid         | 8     |

|    |         |          |                                                                |     |        |                              |                                           |                                |    |
|----|---------|----------|----------------------------------------------------------------|-----|--------|------------------------------|-------------------------------------------|--------------------------------|----|
| 50 | 6.3963  | 433.1507 | C <sub>21</sub> H <sub>22</sub> O <sub>10</sub>                | 217 | 0.1523 | 433, 271, 256, 241           | Naringenin- <i>O</i> -hexoside (Prunin)   | Flavanone glycoside            | 10 |
| 51 | 6.5200  | 269.0465 | C <sub>15</sub> H <sub>10</sub> O <sub>5</sub>                 | 269 | 0.0467 | 269, 151, 117                | Trihydroxyflavone (Apigenin)              | Flavone                        | 16 |
| 52 | 6.7570  | 329.0676 | C <sub>17</sub> H <sub>14</sub> O <sub>7</sub>                 | 329 | 0.0659 | 329, 314, 299, 271           | Tricin                                    | Flavone                        | 6  |
| 53 | 6.7828  | 345.059  | C <sub>19</sub> H <sub>22</sub> O <sub>6</sub>                 | 345 | 0.0632 | 345, 330, 315, 307, 285, 137 | Gibberellic acid                          | Diterpene lactones             | 17 |
| 54 | 6.7951  | 299.0553 | C <sub>16</sub> H <sub>12</sub> O <sub>6</sub>                 | 299 | 0.0567 | 299, 285, 284, 151           | Trihydroxymethoxyflavone (Kaempferide)    | Flavonol                       | 16 |
| 55 | 6.8601  | 381.1511 | C <sub>19</sub> H <sub>26</sub> O <sub>8</sub>                 | 381 | 0.1552 | 381, 251, 87                 | Myristoyl-hydroxy-sn-glycerol             | Fatty acid derivative          | 18 |
| 56 | 7.0754  | 315.0526 | C <sub>16</sub> H <sub>12</sub> O <sub>7</sub>                 | 315 | 0.0514 | 315, 300, 269, 79            | Tetrahydroxymethoxyflavone (Isorhamnetin) | Flavonol                       | 16 |
| 57 | 7.0883  | 415.1511 | C <sub>21</sub> H <sub>20</sub> O <sub>9</sub>                 | 415 | 0.1512 | 415, 295                     | Daidzein- <i>C</i> -hexoside (Puerarin)   | Isoflavone <i>C</i> -glycoside | 9  |
| 58 | 7.0980  | 575.4317 | C <sub>35</sub> H <sub>60</sub> O <sub>6</sub>                 | 575 | 0.1407 | 575, 413, 363                | $\beta$ -Sitosterol-3- <i>O</i> -hexoside | Steroid                        | 19 |
| 59 | 7.3950  | 588.1413 | C <sub>16</sub> H <sub>25</sub> N <sub>5</sub> O <sub>15</sub> | 588 | 0.1380 | 588, 525, 329, 314           | Tricin derivative                         | Flavonoid glycoside            | 9  |
| 60 | 8.8660  | 711.1517 | C <sub>31</sub> H <sub>36</sub> O <sub>19</sub>                | 675 | 0.1720 | 711, 675, 329, 137           | Tricin derivative                         | Flavonoid glycoside            | 9  |
| 61 | 10.059  | 645.2010 | C <sub>32</sub> H <sub>38</sub> O <sub>14</sub>                | 645 | 0.1969 | 645, 525, 315, 270, 137      | Isorhamnetin derivative                   | Flavonoid glycoside            | 6  |
| 62 | 10.5290 | 459.3143 | C <sub>31</sub> H <sub>56</sub> O <sub>2</sub>                 | 459 | 0.3111 | 459, 415                     | Pentacosyl-1,3-benzenediol                | Fatty acid derivative          | 20 |

|    |         |          |                                                   |     |        |                         |                                                  |                       |     |
|----|---------|----------|---------------------------------------------------|-----|--------|-------------------------|--------------------------------------------------|-----------------------|-----|
| 63 | 12.2630 | 867.4821 | C <sub>45</sub> H <sub>72</sub> O <sub>16</sub>   | 867 | 0.2291 | 867, 413, 329           | Dioscin                                          | Steroidal saponin     | 19  |
| 64 | 13.2610 | 639.2294 | C <sub>25</sub> H <sub>49</sub> O <sub>11</sub> P | 555 | 0.2823 | 639, 555, 225           | Hexadecenyl-glycero-3-phospho-(1'-myo-inositol)  | Fatty acid derivative | 6   |
| 65 | 14.0260 | 453.3028 | C <sub>29</sub> H <sub>42</sub> O <sub>4</sub>    | 453 | 0.2980 | 453, 409, 407, 339      | Epoxy-tetrahydro-dihomo-dihydroxycholecalciferol | Vitamin D derivative  | 10  |
| 66 | 15.2280 | 425.3282 | C <sub>29</sub> H <sub>46</sub> O <sub>2</sub>    | 425 | 0.2506 | 425, 381, 139           | hydroxy-24-methylergocalciferol                  | Vitamin D derivative  | 10  |
| 67 | 15.2970 | 89.0261  | C <sub>3</sub> H <sub>6</sub> O <sub>3</sub>      | 89  | 0.0261 | 89, 71                  | Dihydroxyacetone                                 | Organic acid          | 1   |
| 68 | 15.5850 | 369.1107 | C <sub>17</sub> H <sub>22</sub> O <sub>9</sub>    | 277 | 0.2192 | 368, 306, 277           | Sinapaldehyde hexoside                           | Phenolic glycoside    | 9   |
| 69 | 16.8910 | 559.4199 | C <sub>36</sub> H <sub>64</sub> O <sub>4</sub>    | 279 | 0.2333 | 559, 279                | Linoleic acid dimer                              | Fatty acid derivative | 20  |
| 70 | 18.1210 | 585.5093 | C <sub>36</sub> H <sub>58</sub> O <sub>6</sub>    | 255 | 0.2337 | 585, 255                | Deoxyphorbol-palmitate                           | Fatty acid derivative | 20  |
| 71 | 18.7010 | 685.5196 | C <sub>31</sub> H <sub>42</sub> O <sub>17</sub>   | 685 | 0.2455 | 685, 649, 365, 281      | Unknown                                          | ---                   | --- |
| 72 | 18.7910 | 401.2425 | C <sub>24</sub> H <sub>34</sub> O <sub>5</sub>    | 281 | 0.2461 | 401, 325, 281, 137      | Trioxo-cholanoic acid                            | Steroids              | 19  |
| 73 | 20.1650 | 701.4745 | C <sub>31</sub> H <sub>42</sub> O <sub>18</sub>   | 701 | 0.4745 | 701, 569, 419, 302, 119 | Unknown                                          | ---                   | --- |
| 74 | 20.2360 | 199.1741 | C <sub>12</sub> H <sub>24</sub> O <sub>2</sub>    | 129 | 0.1741 | 199, 147, 127, 69, 59   | Methyl-undecanoic acid                           | Fatty acid derivative | 20  |
| 75 | 20.8260 | 359.1939 | C <sub>21</sub> H <sub>28</sub> O <sub>5</sub>    | 359 | 0.1939 | 359, 285, 283, 135      | Dihydroprednisone                                | Steroids              | 19  |



|    |         |          |                                                 |     |        |                                       |                                 |                       |     |
|----|---------|----------|-------------------------------------------------|-----|--------|---------------------------------------|---------------------------------|-----------------------|-----|
| 76 | 22.9190 | 461.3570 | C <sub>25</sub> H <sub>50</sub> O <sub>7</sub>  | 461 | 0.3446 | 461, 193, 151, 138                    | Hexopyranosyl-1,2-nonadecandiol | Fatty acyl glycoside  | 20  |
| 77 | 23.5530 | 461.3664 | C <sub>31</sub> H <sub>58</sub> O <sub>2</sub>  | 461 | 0.3641 | 461, 419, 311, 293, 195, 151          | Hentriacontene-2,4-dione        | Fatty acid derivative | 20  |
| 78 | 24.4630 | 447.0945 | C <sub>21</sub> H <sub>20</sub> O <sub>11</sub> | 447 | 0.3753 | 447, 357, 327, 285, 177               | Luteolin-C-hexoside             | Flavonoid glycoside   | 9   |
| 79 | 25.0640 | 667.5442 | C <sub>43</sub> H <sub>72</sub> O <sub>5</sub>  | 665 | 0.5374 | 665, 377, 283, 136, 62                | Unknown                         | ---                   | --- |
| 80 | 25.6510 | 665.5089 | C <sub>43</sub> H <sub>70</sub> O <sub>5</sub>  | 62  | 0.5089 | 665, 377, 283, 245, 212, 138, 136, 62 | Unknown                         | ---                   | --- |

## References

1. M. Boğa, A. Ertaş, M. A. Yılmaz, M. Kızıllı, B. Çeken, N. Haşimi, T. Y. Özden, S. Demirci, İ. Yener and Ö. Deveci, *Iranian journal of pharmaceutical research : IJPR*, 2016, **15**, 393-405.
2. O. Al Kadhi, A. Melchini, R. Mithen and S. Saha, *Journal of analytical methods in chemistry*, 2017, **2017**, 5391832.
3. A. D. Watson, *Journal of Lipid Research*, 2006, **47**, 2101-2111.
4. L. Tretter, A. Patocs and C. Chinopoulos, *Biochimica et Biophysica Acta (BBA) - Bioenergetics*, 2016, **1857**, 1086-1101.
5. W. Shaw, E. Kassen and E. Chaves, *Clinical chemistry*, 1995, **41**, 1094-1104.
6. I. M. Abu-Reidah, M. M. Contreras, D. Arráez-Román, A. Segura-Carretero and A. Fernández-Gutiérrez, *Journal of chromatography. A*, 2013, **1313**, 212-227.
7. R. Ahmed, E. Elkhisy, W. El-kashak, M. El-Raey, M. Nassar and E.-S. Aboutabl, *Journal of Advanced Pharmacy Research*, 2019, **3**, 23-29.
8. H. Horai, M. Arita, S. Kanaya, Y. Nihei, T. Ikeda, K. Suwa, Y. Ojima, K. Tanaka, S. Tanaka, K. Aoshima, Y. Oda, Y. Kakazu, M. Kusano, T. Tohge, F. Matsuda, Y. Sawada, M. Y. Hirai, H. Nakanishi, K. Ikeda, N. Akimoto, T. Maoka, H. Takahashi, T. Ara, N. Sakurai, H. Suzuki, D. Shibata, S. Neumann, T. Iida, K. Tanaka, K. Funatsu, F. Matsuura, T. Soga, R. Taguchi, K. Saito and T. Nishioka, *Journal of mass spectrometry : JMS*, 2010, **45**, 703-714.
9. I. M. Abu-Reidah, M. S. Ali-Shtayeh, R. M. Jamous, D. Arráez-Román and A. Segura-Carretero, *Food Chemistry*, 2015, **166**, 179-191.
10. Y. Sawada, K. Akiyama, A. Sakata, A. Kuwahara, H. Otsuki, T. Sakurai, K. Saito and M. Y. Hirai, *Plant & cell physiology*, 2009, **50**, 37-47.
11. F. Allen, R. Greiner and D. Wishart, *Metabolomics*, 2015, **11**, 98-110.
12. F. Sánchez-Rabaneda, O. Jáuregui, I. Casals, C. Andrés-Lacueva, M. Izquierdo-Pulido and R. M. Lamuela-Raventós, *Journal of mass spectrometry : JMS*, 2003, **38**, 35-42.
13. F. Matsuda, R. Nakabayashi, Y. Sawada, M. Suzuki, M. Y. Hirai, S. Kanaya and K. Saito, *Frontiers in plant science*, 2011, **2**, 40.
14. I. Parejo, O. Jauregui, F. Sánchez-Rabaneda, F. Viladomat, J. Bastida and C. Codina, *Journal of agricultural and food chemistry*, 2004, **52**, 3679-3687.
15. N. Fabre, I. Rustan, E. de Hoffmann and J. Quetin-Leclercq, *Journal of the American Society for Mass Spectrometry*, 2001, **12**, 707-715.
16. A. Bouhafoun, M. Yilmaz, A. Boukeloua, H. Temel and M. Kaid-Harche, *Ciência e Tecnologia de Alimentos*, 2018, **38**.
17. N. Takeda, Y. Handa, S. Tsuzuki, M. Kojima, H. Sakakibara and M. Kawaguchi, *Plant Signaling & Behavior*, 2015, **10**, e1028706.
18. A. Moritz, P. N. De Graan, W. H. Gispen and K. W. Wirtz, *The Journal of biological chemistry*, 1992, **267**, 7207-7210.
19. B. Avula, Y. H. Wang, M. Wang, Z. Ali, T. J. Smillie, J. Zweigenbaum and I. A. Khan, *Planta medica*, 2014, **80**, 321-329.
20. A. M. Murad, G. R. Vianna, A. M. Machado, N. B. da Cunha, C. M. Coelho, V. A. Lacerda, M. C. Coelho and E. L. Rech, *Analytical and bioanalytical chemistry*, 2014, **406**, 2873-2883.
21. E. Stahl, in *Thin-Layer Chromatography: A Laboratory Handbook*, Springer, 1969, pp. 52-86.
22. A. Asami, Y. Hirai and J. Shoji, *Chemical and pharmaceutical bulletin*, 1991, **39**, 2053-2056.
23. S. Zona, *Harvard Papers in Botany*, 1997, **2**, 71-107.
24. K. R. Markham, *Techniques of flavonoid identification*, 1982.
25. T. J. Mabry, K. Markham, M. Thomas, T. J. Mabry, K. Markham and M. Thomas, *Journal*, 1970, 41-146.
26. Z. Güvenalp, H. Özbek, T. Ünsalar, C. Kazaz and L. Demirezer, *Turkish Journal of Chemistry*, 2006, **30**, 391-400.

27. H. Wagner, S. Bladt and E.-M. Zgainski, *Drogenanalyse: dünnschichtchromatographische analyse von arzneidrogen*, Springer-Verlag, 2013.
28. J. Goad and T. Akihisa, *Analysis of sterols*, Springer Science & Business Media, 2012.
29. H. Ibrahim, F. Elshaarawy and E. Haggag, *Journal of Advanced Pharmacy Research*, 2018, **2**, 256-268.
30. D.-M. Wang, W.-J. Pu, Y.-H. Wang, Y.-J. Zhang and S.-S. Wang, *Molecules (Basel, Switzerland)*, 2012, **17**, 4595-4603.
31. S. Prinz, A. Ringl, A. Huefner, E. Pemp and B. Kopp, *Chemistry & Biodiversity*, 2007, **4**, 2920-2931.
32. K. Idaka, Y. Hirai and J. Shoji, *Chemical and pharmaceutical bulletin*, 1991, **39**, 1455-1461.
